# Supplementary material for: Differences in the incidence, characteristics, and outcomes of patients with acute kidney injury in the medical and surgical intensive care units
Source: PubMed Central journal article supplement — Kidney Res Clin Pract. 2024 Jun 17;43(4):518–27. doi: 10.23876/j.krcp.23.312 (PMC11237328; doi:10.23876/j.krcp.23.312), 2024-06-17
Supplement: j-krcp-23-312-Supplementary-Fig-1.pdf [file j-krcp-23-312-Supplementary-Fig-1.pdf]

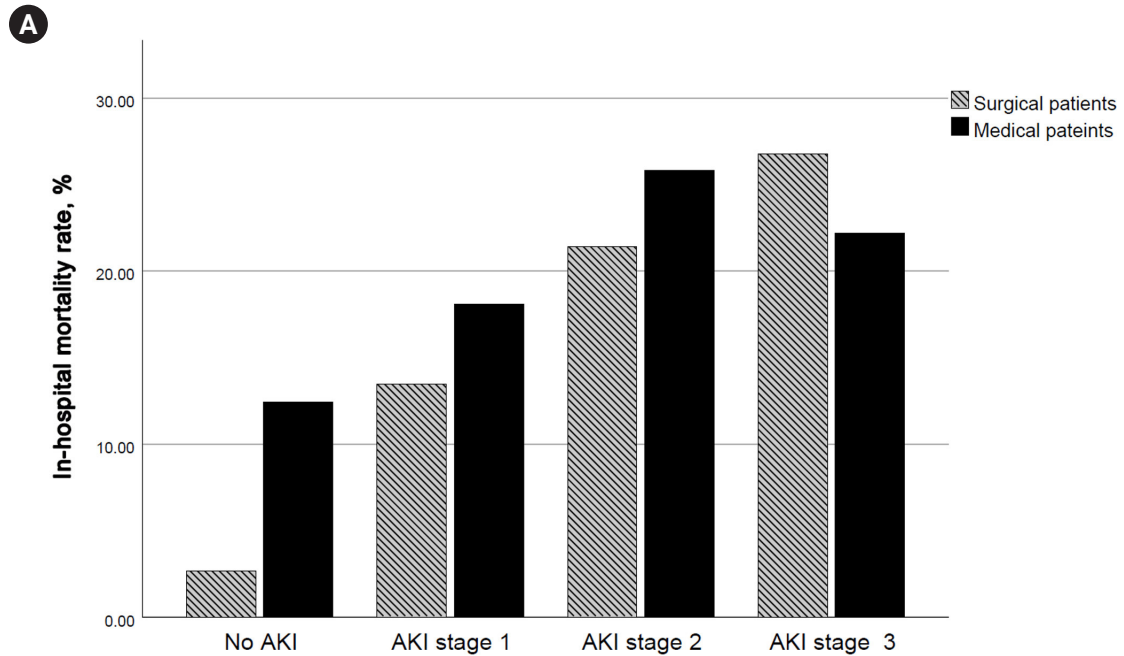

**B**

| Variable     | No AKI<br>(n = 4,692) | AKI stage 1<br>(n = 915) | AKI stage 2<br>(n = 481) | AKI stage 3<br>(n = 538) | AKI stage 3D<br>(n = 527) | p-value |
|--------------|-----------------------|--------------------------|--------------------------|--------------------------|---------------------------|---------|
| Age >75 yr   | 859 (18.3)            | 215 (23.5)               | 101 (21.0)               | 109 (20.3)               | 108 (20.5)                | 0.04    |
| DM           | 1,869 (39.8)          | 469 (51.3)               | 260 (54.1)               | 347 (64.5)               | 323 (61.3)                | <0.001  |
| Hypertension | 2,905 (61.9)          | 643 (70.3)               | 377 (78.4)               | 459 (85.3)               | 410 (77.8)                | <0.001  |
| CKD          | 681 (14.5)            | 188 (20.5)               | 66 (13.7)                | 265 (49.3)               | 265 (50.3)                | <0.001  |
| IHD          | 707 (15.1)            | 130 (14.2)               | 70 (14.6)                | 90 (16.7)                | 102 (19.4)                | 0.03    |
| Sepsis       | 1,310 (27.9)          | 389 (42.5)               | 249 (51.8)               | 247 (45.9)               | 247 (46.9)                | <0.001  |

Values are presented as number (%).  
p-value for trend (linear-by-linear association).

**Supplementary Figure 1. Differences in in-hospital mortality rate (A) and proportion of comorbidities (B) by AKI severity.**

AKI, acute kidney injury; CKD, chronic kidney disease; DM, diabetes mellitus; IHD, ischemic heart disease.
