# Supplementary material for: Differences in the incidence, characteristics, and outcomes of patients with acute kidney injury in the medical and surgical intensive care units
Source: PubMed Central journal article supplement — Kidney Res Clin Pract. 2024 Jun 17;43(4):518–27. doi: 10.23876/j.krcp.23.312 (PMC11237328; doi:10.23876/j.krcp.23.312), 2024-06-17
Supplement: j-krcp-23-312-Supplementary-Table-1.pdf [file j-krcp-23-312-Supplementary-Table-1.pdf]

**Supplementary Table 1. Criteria of each etiology**

| Cause of AKI                                                                     | Blood                                                                       | Urine                         | Radiology                                              | Clinical context                                                                                    | Renal biopsy                                  |
|----------------------------------------------------------------------------------|-----------------------------------------------------------------------------|-------------------------------|--------------------------------------------------------|-----------------------------------------------------------------------------------------------------|-----------------------------------------------|
| Sepsis [14,15]                                                                   | Elevated WBC > 12,000 cells/mm <sup>3</sup> or <4,000 cells/mm <sup>3</sup> | Positive urine culture        | Documented source of infection (US, CT, MRI)           | SIRS criteria (temperature >38 °C or <36 °C, heart rate >90 beats/min, respiratory >20 breaths/min) | NA                                            |
|                                                                                  | With or without positive blood culture                                      | Positive urine WBC            |                                                        |                                                                                                     |                                               |
| Volume overload/depletion                                                        | NA                                                                          | NA                            | Echocardiography, CXR, CT                              | NA                                                                                                  | NA                                            |
| Drug-related                                                                     | NA                                                                          | NA                            |                                                        | Documented use of nephrotoxins                                                                      | NA                                            |
| Cardiac dysfunction                                                              | NA                                                                          | NA                            | Congestive heart condition (CXR, CT, echocardiography) | Chronic heart disease                                                                               | NA                                            |
|                                                                                  |                                                                             |                               |                                                        | Low BP (systolic BP <90 mmHg or reduction of >40 mmHg from baseline)                                |                                               |
| Hepatorenal syndrome [13,16]                                                     | NA                                                                          | Low urine sodium (<10 mmol/L) | NA                                                     | Severe liver disease                                                                                | NA                                            |
|                                                                                  |                                                                             |                               |                                                        | Excluding other known causes of renal failure                                                       |                                               |
| Obstruction of urinary tract                                                     | NA                                                                          | NA                            | US, CT, MRI                                            | NA                                                                                                  | NA                                            |
| Others (vasculitis, glomerulitis, graft rejection, nephritic/nephrotic syndrome) | NA                                                                          | NA                            | NA                                                     | NA                                                                                                  | Previously diagnosed or done during admission |

AKI, acute kidney injury; BP, blood pressure; CT, computed tomography; CXR, chest X-ray; MRI, magnetic resonance imaging; NA, not available; SIRS, systemic inflammatory response syndrome; US, ultrasonography; WBC, white blood cell.
