# Supplementary material for: Differences in the incidence, characteristics, and outcomes of patients with acute kidney injury in the medical and surgical intensive care units
Source: PubMed Central journal article supplement — Kidney Res Clin Pract. 2024 Jun 17;43(4):518–27. doi: 10.23876/j.krcp.23.312 (PMC11237328; doi:10.23876/j.krcp.23.312), 2024-06-17
Supplement: j-krcp-23-312-Supplementary-Table-2.pdf [file j-krcp-23-312-Supplementary-Table-2.pdf]

**Supplementary Table 2. Differences in patient outcomes between medical and surgical patients by AKI status**

| Variable              | Total (n = 7,150) |           | Medical (n = 3,625) |            | Surgical (n = 3,525) |           |
|-----------------------|-------------------|-----------|---------------------|------------|----------------------|-----------|
|                       | AKI               | No AKI    | AKI                 | No AKI     | AKI                  | No AKI    |
| LOS at hospital (day) | 22 (13–41)*       | 14 (8–24) | 22 (12–42)*         | 14 (6–29)  | 24 (14–40)*          | 14 (9–22) |
| 30-Day mortality      | 429 (17.4)*       | 278 (5.9) | 315 (17.8)*         | 205 (11.0) | 114 (16.4)*          | 73 (2.6)  |
| 60-Day mortality      | 487 (19.8)*       | 293 (6.2) | 360 (20.4)*         | 218 (11.7) | 127 (18.3)*          | 75 (2.6)  |
| 90-Day mortality      | 497 (20.2)*       | 301 (6.4) | 367 (20.8)*         | 225 (12.1) | 130 (18.7)*          | 76 (2.7)  |
| In-hospital mortality | 512 (20.8)*       | 307 (6.5) | 381 (21.6)*         | 231 (12.4) | 131 (18.9)*          | 76 (2.7)  |

Data are expressed as median (interquartile range) or number (%).

AKI, acute kidney injury; LOS, length of stay.

\*p < 0.05.
