# Supplementary material for: Differences in the incidence, characteristics, and outcomes of patients with acute kidney injury in the medical and surgical intensive care units
Source: PubMed Central journal article supplement — Kidney Res Clin Pract. 2024 Jun 17;43(4):518–27. doi: 10.23876/j.krcp.23.312 (PMC11237328; doi:10.23876/j.krcp.23.312), 2024-06-17
Supplement: j-krcp-23-312-Supplementary-Table-3.pdf [file j-krcp-23-312-Supplementary-Table-3.pdf]

**Supplementary Table 3. Risk of in-hospital mortality among AKI patients**

| Factor                 | Unadjusted model |         | Adjusted model   |         |
|------------------------|------------------|---------|------------------|---------|
|                        | HR (95% CI)      | p-value | HR (95% CI)      | p-value |
| Age                    | 1.01 (1.00–1.02) | 0.001   | 1.01 (1.00–1.01) | 0.03    |
| Diabetes mellitus      | 1.68 (1.39–2.02) | <0.001  | 1.46 (1.20–1.78) | <0.001  |
| Hypertension           | 2.35 (1.78–3.11) | <0.001  | 1.93 (1.44–2.59) | <0.001  |
| Chronic kidney disease | 0.89 (0.73–1.09) | 0.26    | 0.76 (0.61–0.95) | 0.02    |
| Ischemic heart disease | 1.39 (1.11–1.74) | 0.004   | 1.36 (1.07–1.73) | 0.01    |
| COPD, asthma           | 1.51 (1.13–2.02) | 0.006   | 1.27 (0.95–1.71) | 0.11    |
| Malignancy             | 1.70 (1.43–2.02) | <0.001  | 1.36 (1.13–1.64) | 0.001   |
| Sepsis                 | 1.71 (1.43–2.04) | <0.001  | 1.50 (1.24–1.80) | <0.001  |
| Albumin level          | 0.53 (0.45–0.62) | <0.001  | 0.64 (0.54–0.77) | <0.001  |
| Total SOFA score       | 1.06 (1.04–1.09) | <0.001  | 1.06 (1.03–1.09) | <0.001  |
| Hospital-acquired AKI  | 1.07 (0.86–1.33) | 0.56    | 1.00 (0.80–1.25) | 0.98    |
| Surgical patient       | 0.89 (0.73–1.09) | 0.26    | 1.18 (0.96–1.45) | 0.12    |
| AKI stage              |                  |         |                  |         |
| AKI stage 1            | Reference        |         | Reference        |         |
| AKI stage 2            | 1.48 (1.16–1.88) | 0.002   | 1.30 (1.02–1.66) | 0.03    |
| AKI stage 3            | 1.59 (1.26–2.00) | <0.001  | 1.29 (1.02–1.65) | 0.04    |
| AKI stage 3D           | 1.09 (0.85–1.40) | 0.50    | 0.93 (0.71–1.22) | 0.59    |

AKI, acute kidney injury; CI, confidence interval; COPD, chronic obstructive pulmonary disease; HR, hazard ratio; SOFA, Sequential Organ Failure Assessment.
